# Supplementary material for: Increased TCR signal strength in DN thymocytes promotes development of gut TCRαβ(+)CD8αα(+) intraepithelial lymphocytes
Source: PubMed Central journal article supplement (PMC5587556; doi:10.1038/s41598-017-09368-x), 2017-09-06
Supplement: 41598_2017_9368_MOESM1_ESM.pdf [file 41598_2017_9368_MOESM1_ESM.pdf]

**Increased TCR signal strength in DN thymocytes promotes development of gut  $\text{TCR}\alpha\beta^{(+)}\text{CD8}\alpha\alpha^{(+)}$  intraepithelial lymphocytes**

Capucine L. Grandjean, Nital Sumaria, Stefania Martin, Daniel J. Pennington\*

Blizard Institute, Barts and The London School of Medicine, Queen Mary University of London, London E1 2AT.

\*Correspondence should be addressed to DJP: [d.pennington@qmul.ac.uk](mailto:d.pennington@qmul.ac.uk)

## Supplementary Data S1

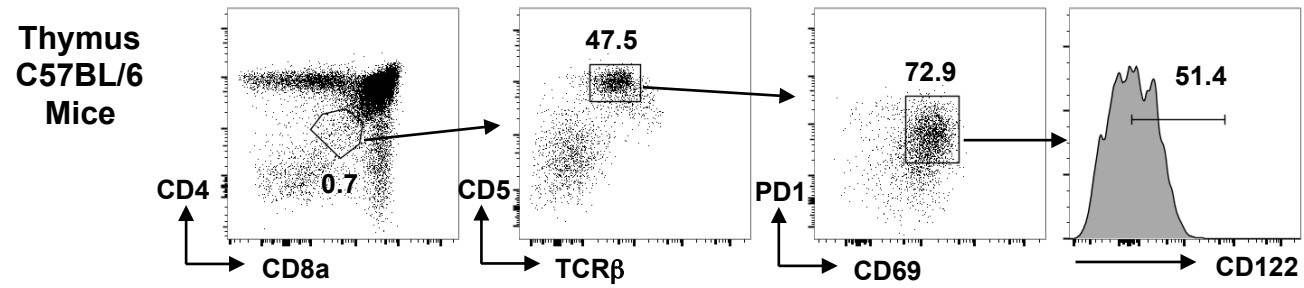

### Supplementary Figure S1

Flow cytometry gating strategy used to identify thymic IEL progenitors (as described by *Mayans et al., Immunity 2014, 41 p207-218*)

## Supplementary Data S2

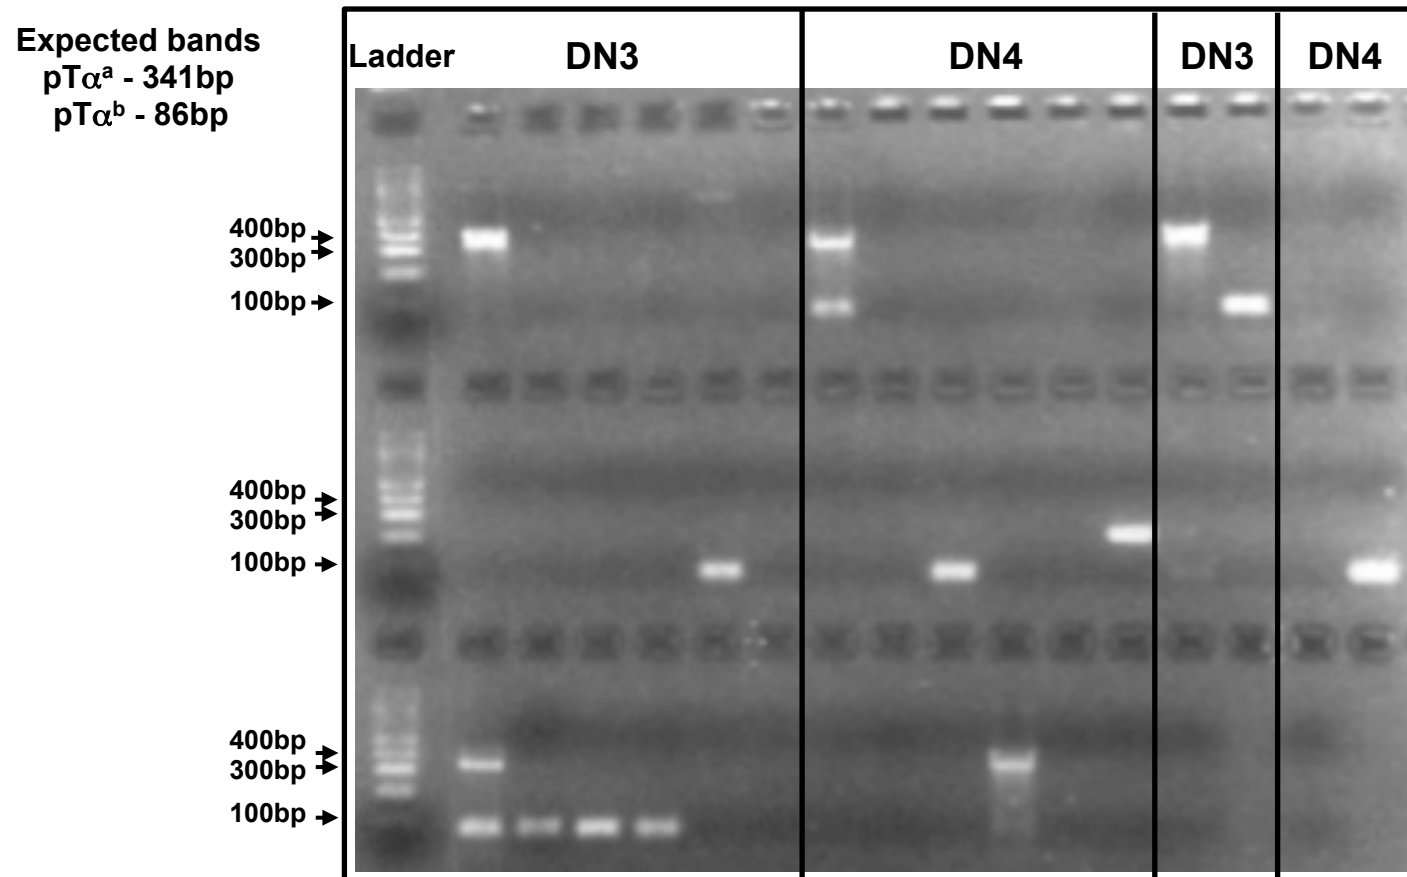

### Supplementary Figure S2

Agarose gel from single-cell PCR experiments demonstrating existence of cells expressing pT $\alpha^a$  only, pT $\alpha^b$  only, or both isoforms. Protocol and primers are described in methods. Expected bands are 341bp for pT $\alpha^a$  and 86bp for pT $\alpha^b$ . Bands were excised and sequenced to confirm identity.

## Supplementary Data S3

**A**

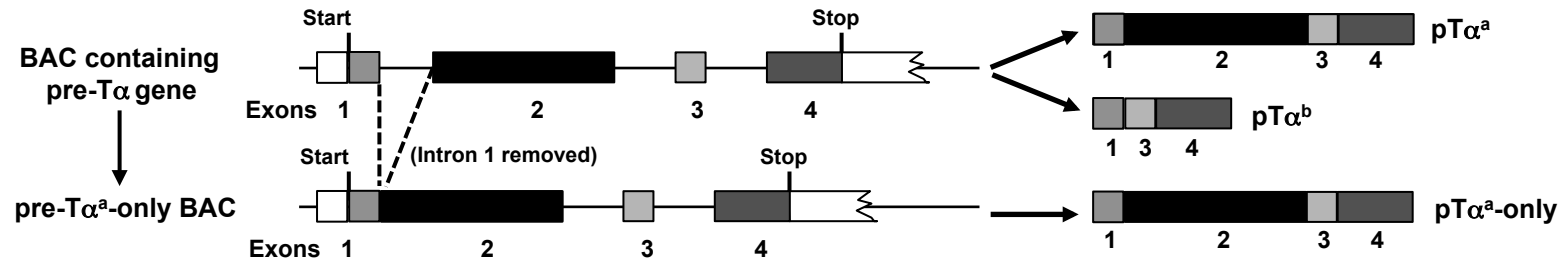

**B**

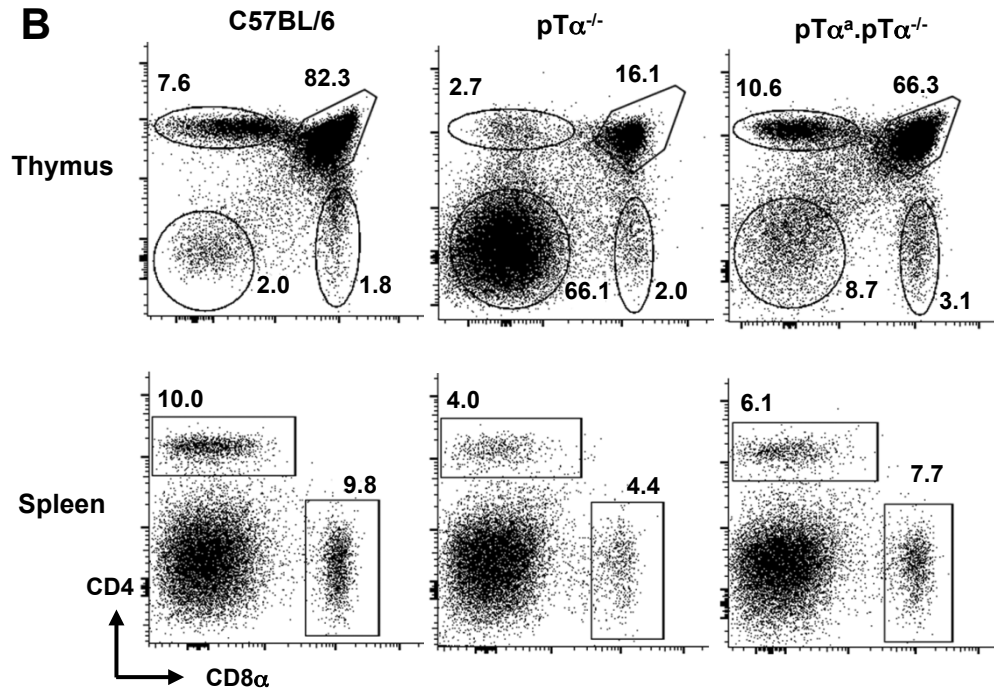

### Supplementary Figure S3

(A) Schematic representation of the strategy used to generate pT $\alpha^a$  BAC-transgenic mice. (B) Representative CD4 versus CD8 flow cytometry plots from thymus and spleen of C57BL/6, pT $\alpha$ -deficient and pT $\alpha^a$ .pT $\alpha^{-/-}$  mice. Percentages of gated cells are indicated.

## Supplementary Data S4

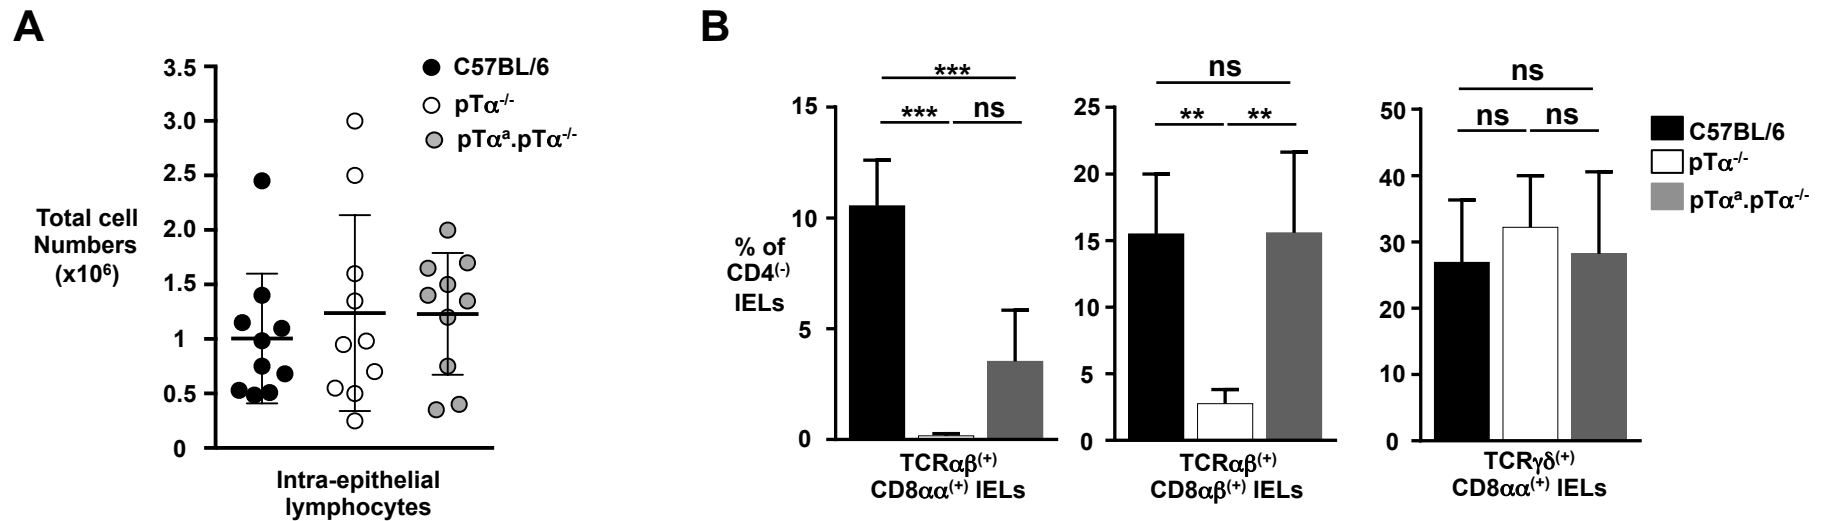

### Supplementary Figure S4

(A) Total cell yield for IEL-preps from C57BL/6,  $pT\alpha^{-/-}$  and  $pT\alpha^a.pT\alpha^{-/-}$  mice. (B) Summary bar graphs ( $n > 6$ ) of the percentages (of total  $CD4^{(-)}$  IELs) of  $TCR\alpha\beta^{(+)CD8\alpha\alpha^{(+)}$ ,  $TCR\alpha\beta^{(+)CD8\alpha\beta^{(+)}$ , and  $TCR\gamma\delta^{(+)CD8\alpha\alpha^{(+)}$  IELs from C57BL/6,  $pT\alpha^{-/-}$  and  $pT\alpha^a.pT\alpha^{-/-}$  mice. \*\*\*  $p < 0.001$ , \*\*  $p < 0.01$ , ns is for not significant.

## Supplementary Information S5

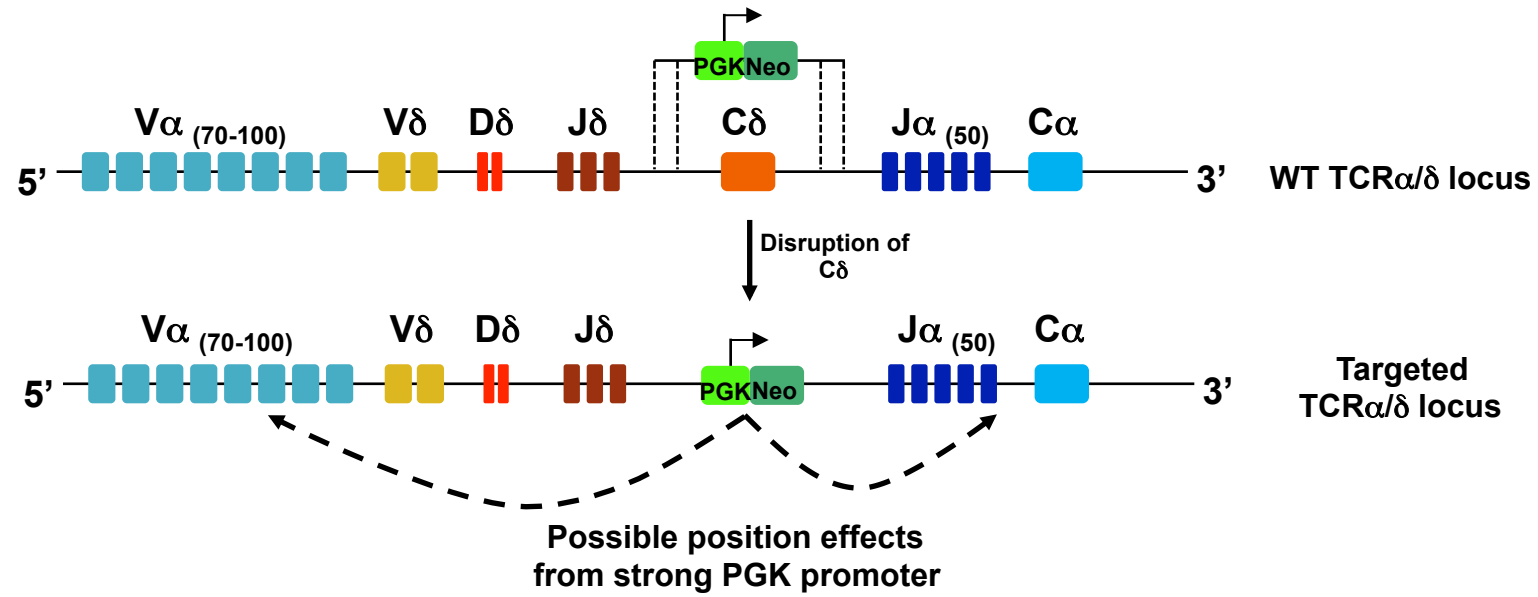

### Supplementary Figure S5

Schematic overview of the targeted TCR $\delta$  locus in TCR $\delta^{-/-}$  mice.
